# Supplementary material for: Observing atmospheric formaldehyde (HCHO) from space: validation and intercomparison of six retrievals from four satellites (OMI, GOME2A, GOME2B, OMPS) with SEAC 4 RS aircraft observations over the Southeast US
Source: Copernicus journal article supplement (doi:10.5194/acp-2016-162), 2016-03-14
Supplement: Supplementary file [file acp-2016-162-AC1-supplement.zip]

**Table S1** Summary of different HCHO retrievals validated and intercompared in this work

|                                             | OMI-SAO<br>(V003)                                                                | OMI-BIRA                                                                         | GOME2A-<br>BIRA (V14)                                                               | GOME2B-<br>BIRA (V14)                                                               | OMPS-SAO                                                                         | OMPS-PCA                                                                                     |
|---------------------------------------------|----------------------------------------------------------------------------------|----------------------------------------------------------------------------------|-------------------------------------------------------------------------------------|-------------------------------------------------------------------------------------|----------------------------------------------------------------------------------|----------------------------------------------------------------------------------------------|
| Fitting window<br>(nm)                      | 328.5–356.5                                                                      | 328.5–346.0                                                                      | 328.5–346.0                                                                         | 328.5–346.0                                                                         | 327.7–356.0                                                                      | 328.5–356.5                                                                                  |
| Spectral<br>resolution (nm,<br>at 340 nm)   | 0.42                                                                             | 0.42                                                                             | 0.27                                                                                | 0.28                                                                                | ~1                                                                               | ~1                                                                                           |
| Fitted species                              | O <sub>3</sub> , NO <sub>2</sub> , BrO,<br>O <sub>2</sub> -O <sub>2</sub> , Ring | O <sub>3</sub> , NO <sub>2</sub> , BrO,<br>O <sub>2</sub> -O <sub>2</sub> , Ring | O <sub>3</sub> , NO <sub>2</sub> , BrO,<br>O <sub>2</sub> -O <sub>2</sub> , Ring    | O <sub>3</sub> , NO <sub>2</sub> , BrO,<br>O <sub>2</sub> -O <sub>2</sub> , Ring    | O <sub>3</sub> , NO <sub>2</sub> , BrO,<br>O <sub>2</sub> -O <sub>2</sub> , Ring | BrO (O <sub>3</sub> , Ring,<br>NO <sub>2</sub> features are<br>from principal<br>components) |
| HCHO cross-<br>section                      | Chance and<br>Orphal [2011],<br>300K                                             | Meller and<br>Moortgat<br>[2000], 298K                                           | Meller and<br>Moortgat<br>[2000], 298K                                              | Meller and<br>Moortgat<br>[2000], 298K                                              | Chance and<br>Orphal [2011],<br>300K                                             | -                                                                                            |
| Closure<br>polynomial                       | 3 <sup>rd</sup> order                                                            | 5 <sup>th</sup> order                                                            | 5 <sup>th</sup> order                                                               | 5 <sup>th</sup> order                                                               | 3 <sup>rd</sup> order                                                            | -                                                                                            |
| Underdamping<br>correction                  | Yes                                                                              | No                                                                               | No                                                                                  | No                                                                                  | Yes                                                                              | -                                                                                            |
| Additional fit<br>parameters                | Residual<br>common mode<br>spectrum                                              | Non-linear O <sub>3</sub><br>absorption<br>effect                                | Non-linear O <sub>3</sub><br>absorption<br>effect;<br>Polarisation<br>cross-section | Non-linear O <sub>3</sub><br>absorption<br>effect;<br>Polarisation<br>cross-section | Residual<br>common mode<br>spectrum                                              | Principal<br>components<br>derived from<br>radiances                                         |
| Cloud product<br>used                       | OMI O4 cloud<br>product,<br>Acarreta et al.<br>[2004]                            | OMI O4 cloud<br>product,<br>Stammes et al.<br>[2008].                            | GOME-2 O2 A-<br>band Frescov6<br>product, Wang<br>et al. [2008]                     | GOME-2 O2 A-<br>band Frescov6<br>product, Wang<br>et al. [2008]                     | OMPS cloud<br>product,<br>Vasilkov et al.<br>[2014]                              | OMPS cloud<br>product,<br>Vasilkov et al.<br>[2014]                                          |
| Vertical layers<br>of the CTM               | 47                                                                               | 40                                                                               | 40                                                                                  | 40                                                                                  | 47                                                                               | 72                                                                                           |
| Horizontal<br>resolutions of<br>the CTM     | 2°×2.5°                                                                          | 2°×2.5°                                                                          | 2°×2.5°                                                                             | 2°×2.5°                                                                             | 2°×2.5°                                                                          | 2°×2.5°                                                                                      |
| A prior HCHO<br>profiles                    | 1300 to 1400<br>Monthly<br>average in 2007                                       | Sampled<br>at the satellite<br>overpass times                                    | Sampled<br>at the satellite<br>overpass times                                       | Sampled<br>at the satellite<br>overpass times                                       | 1300 to 1400<br>Monthly<br>average in 2007                                       | Monthly<br>average, 2005–<br>2007                                                            |
| Resolution of<br>scattering<br>weight grids | 2°×2.5°                                                                          | Interpolated for<br>each satellite<br>pixel (surface                             | Interpolated for<br>each satellite<br>pixel (surface                                | Interpolated for<br>each satellite<br>pixel (surface                                | 2°×2.5°                                                                          | 2°×2.5°                                                                                      |

|                                                |                              |                                                        |                                                        |                                                        |                              |                      |
|------------------------------------------------|------------------------------|--------------------------------------------------------|--------------------------------------------------------|--------------------------------------------------------|------------------------------|----------------------|
|                                                |                              | albedo, surface<br>altitude,<br>observation<br>angles) | albedo, surface<br>altitude,<br>observation<br>angles) | albedo, surface<br>altitude,<br>observation<br>angles) |                              |                      |
| Terrain<br>corrections                         | Yes                          | Yes, based on<br>Zhou et al.<br>[2009]                 | Yes                                                    | Yes                                                    | Yes                          | Yes                  |
| Treatment of<br>aerosols                       | No                           | No                                                     | No                                                     | No                                                     | No                           | No                   |
| Reference<br>sector<br>correction <sup>a</sup> | Pixel-by-pixel<br>correction | Modelled by a<br>polynomial                            | Modelled by a<br>polynomial                            | Modelled by a<br>polynomial                            | Pixel-by-pixel<br>correction | Model<br>climatology |

<sup>a</sup>SAO retrievals applied the “pixel-by-pixel correction” method, which accounts for the difference between retrieved and GEOS-Chem modelled slant columns over the remote Pacific Ocean. For BIRA retrievals, the reference sector correction refers to the latitudinal dependency (modelled by a polynomial) of the HCHO slant columns in the reference sector. For OMPS PCA retrievals, the latitude-dependent GMI monthly climatology HCHO column amount over the remote Pacific is added to all pixels, without pixel-specific correction.

## References

- Acarreta, J. R., De Haan, J. F., and Stammes, P.: Cloud pressure retrieval using the O<sub>2</sub>–O<sub>2</sub> absorption band at 477 nm, *J. Geophys. Res.-Atmos.*, 109, D05204, doi:10.1029/2003JD003915, 2004.
- Chance, K. and Orphal, J.: Revised ultraviolet absorption cross sections of H<sub>2</sub>CO for the HITRAN database, *J. Quant. Spectrosc. Ra.*, 112, 1509–1510, doi:10.1016/j.jqsrt.2011.02.002, 2011.
- Meller, R., and Moortgat, G. K.: Temperature dependence of the absorption cross section of HCHO between 223 and 323K in the wavelength range 225–375 nm, *J. Geophys. Res.*, 105, 7089–7102, doi:10.1029/1999JD901074, 2000.
- Stammes, P., Sneep, M., de Haan, J. F., Veefkind, J. P., Wang, P., and Levelt, P. F.: Effective cloud fractions from the Ozone Monitoring Instrument: Theoretical framework and validation, *J. Geophys. Res.*, 113, D16S38, doi:10.1029/2007JD008820, 2008.
- Vasilkov, A., Joiner, J., and Seftor, C.: First results from a rotational Raman scattering cloud algorithm applied to the Suomi National Polar-orbiting Partnership (NPP) Ozone Mapping and Profiler Suite (OMPS) Nadir Mapper, *Atmos. Meas. Tech.*, 7, 2897–2906, doi:10.5194/amt-7-2897-2014, 2014. 9217, 9220.
- Wang, P., Stammes, P., van der A, R., Pinardi, G., and van Roozendael, M.: FRESCO+: an improved O<sub>2</sub> A-band cloud retrieval algorithm for tropospheric trace gas retrievals, *Atmos. Chem. Phys.*, 8, 6565–6576, doi:10.5194/acp-8-6565-2008, 2008.
- Zhou, Y., Brunner, D., Boersma, K. F., Dirksen, R., and Wang, P.: An improved tropospheric NO<sub>2</sub> retrieval for OMI observations in the vicinity of mountainous terrain, *Atmos. Meas. Tech.*, 2, 401–416, doi:10.5194/amt-2-401-2009, 2009.
